# Supplementary material for: Synthesis and properties of BiDy composite electrode materials in electrochemical sensors
Source: Royal Society of Chemistry journal article supplement (doi:10.1039/d2qm00298a), 2022-01-01
Supplement: d2qm00298a1.pdf [file d2qm00298a1.pdf]

# **Synthesis and properties of BiDy composite electrode materials in electrochemical sensors**

Feihu Tao, Chunhu Yu, Jianfeng Huang, Feiyang Li, Zhengyu Cai, Chuangang Fan  
and Lizhai Pei\*

---

*School of Materials Science and Engineering, Anhui University of Technology, Ma'anshan, Anhui 243002, P. R. China. E-mail: lzpei1977@163.com, lzpei@ahut.edu.cn*

Fig. S1 shows the SEM images of the BiDy composite nanoscale materials with different magnifications synthesized from 180 °C for 24 h using SDS with different concentrations as the surfactant.

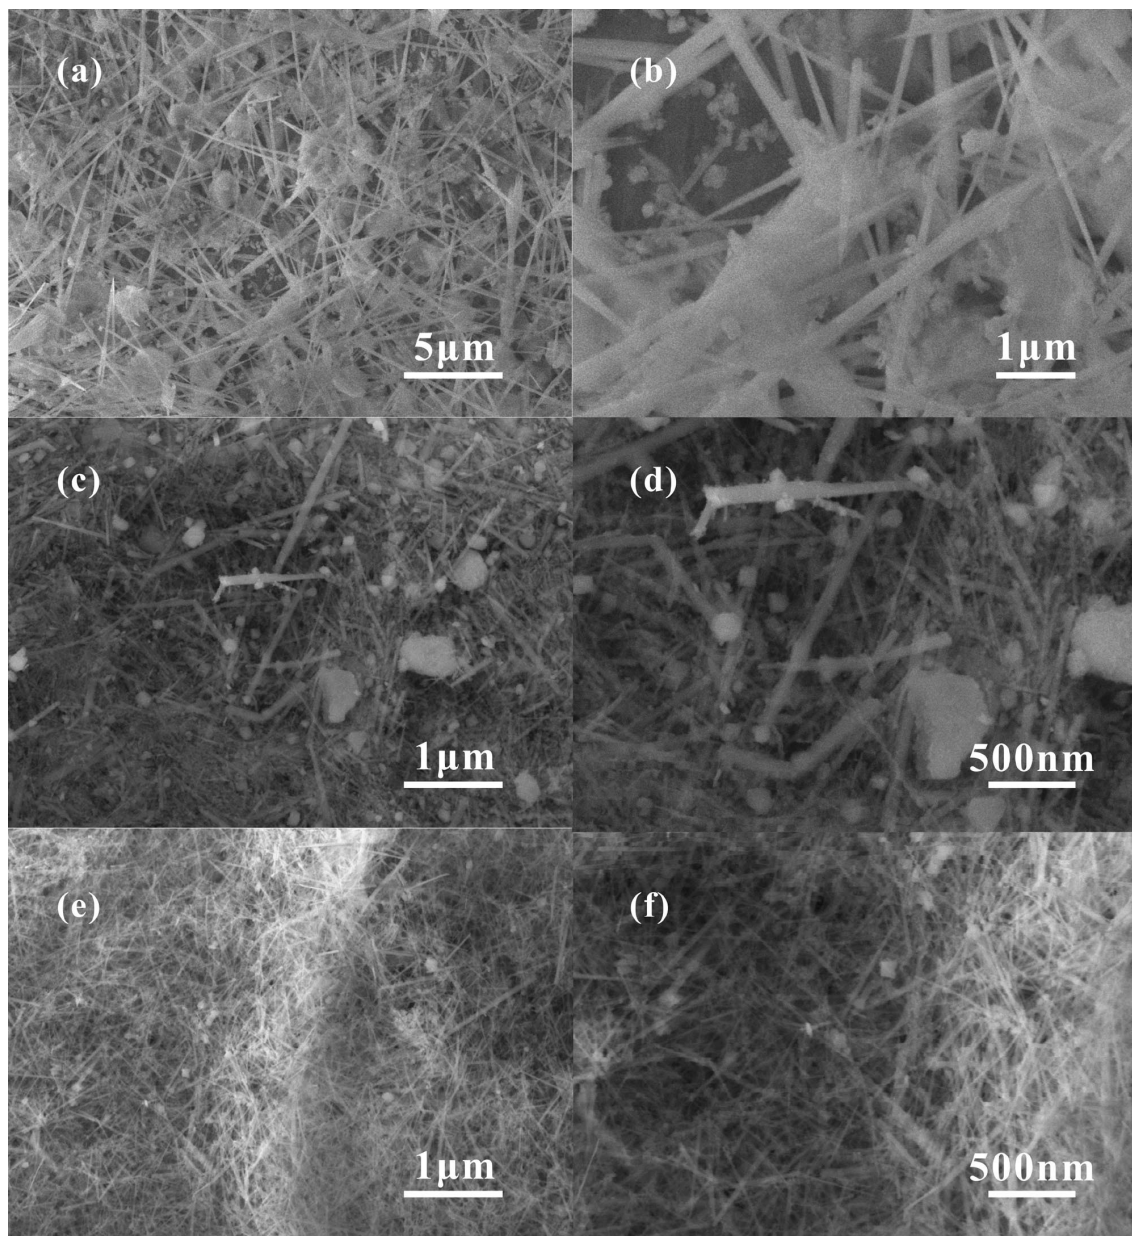

**Fig. S1** SEM images of the BiDy composite nanoscale materials with different magnifications synthesized from 180 °C for 24 h using different SDS concentrations. (a) and (b) Without SDS, (c) and (d) 1wt.%, (e) and (f) 3wt.%.

Fig. S2 shows the XRD patterns of the BiDy composite nanoscale materials synthesized from 180 °C for 24 h using different SDS concentrations.

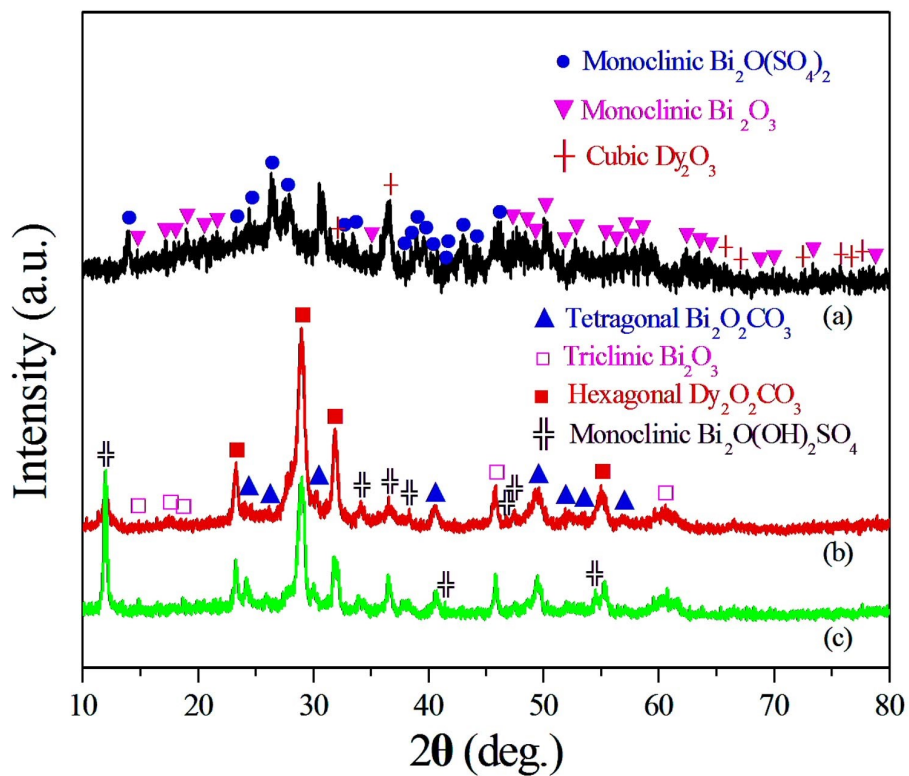

**Fig. S2** XRD patterns of the BiDy composite nanoscale materials synthesized from 180 °C for 24 h using different SDS concentrations. (a) Without SDS, (b) 1wt.%, (c) 3wt.%.

Fig. S3 shows the SEM images of the BiDy composite nanoscale materials with different magnifications obtained from different temperatures for 24 h using 5wt.% SDS.

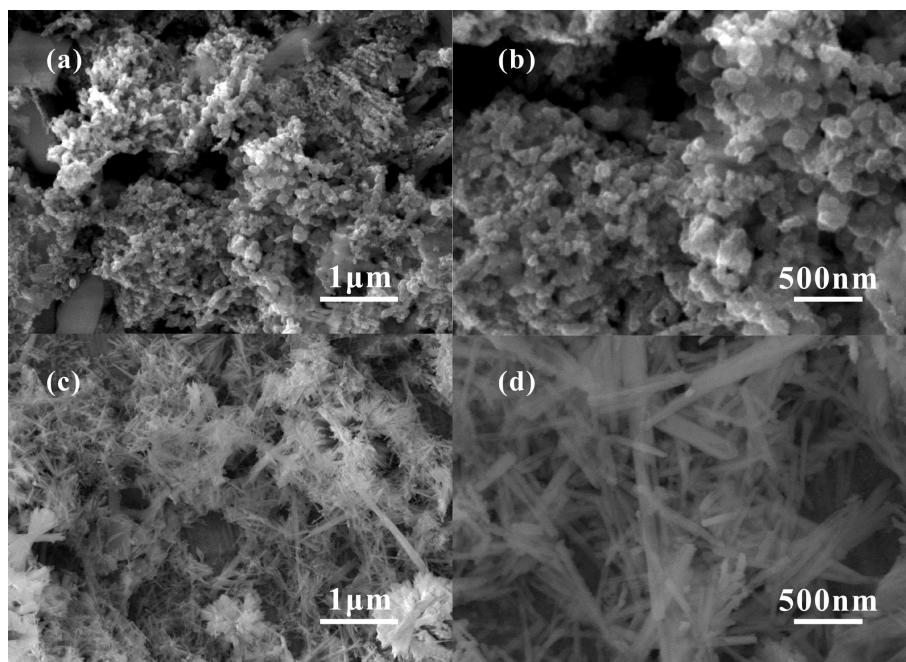

**Fig. S3** SEM images of the BiDy composite nanoscale materials with different magnifications obtained from different temperatures for 24 h using 5wt.% SDS. (a) and (b) 80 °C, (c) and (d) 120 °C.

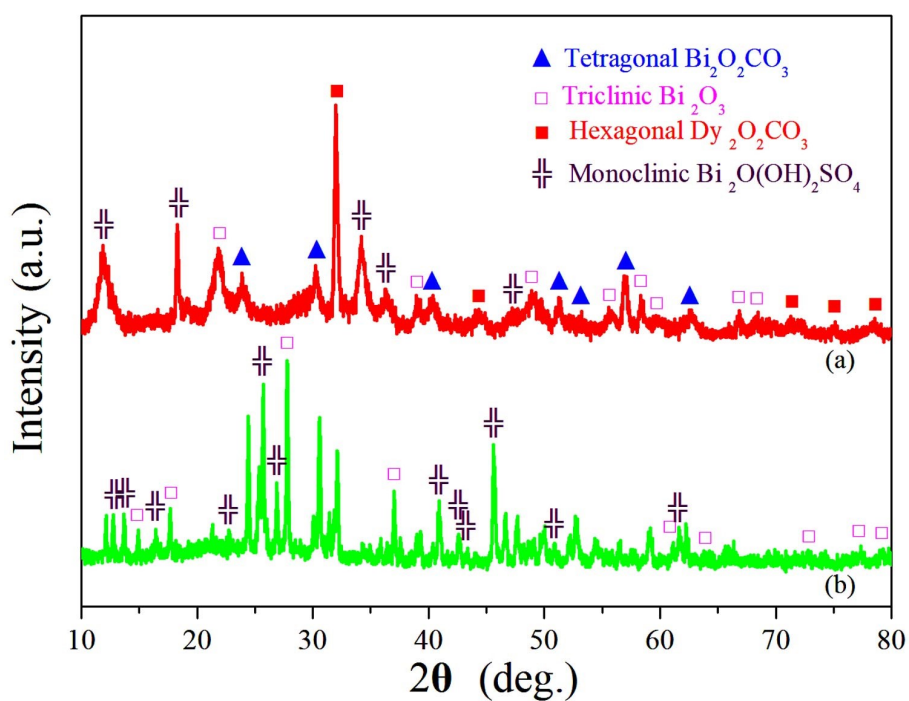

**Fig. S4** XRD patterns of the BiDy composite nanoscale materials obtained from different temperatures for 24 h using 5wt.% SDS. (a) 80 °C, (b) 120 °C.

Fig. S4 shows the XRD patterns of the BiDy composite nanoscale materials obtained from different temperatures for 24 h using 5wt.% SDS.

Fig. S5 shows the SEM images of the BiDy composite nanoscale materials with different magnifications obtained from 180 °C for different time using 5wt.% SDS.

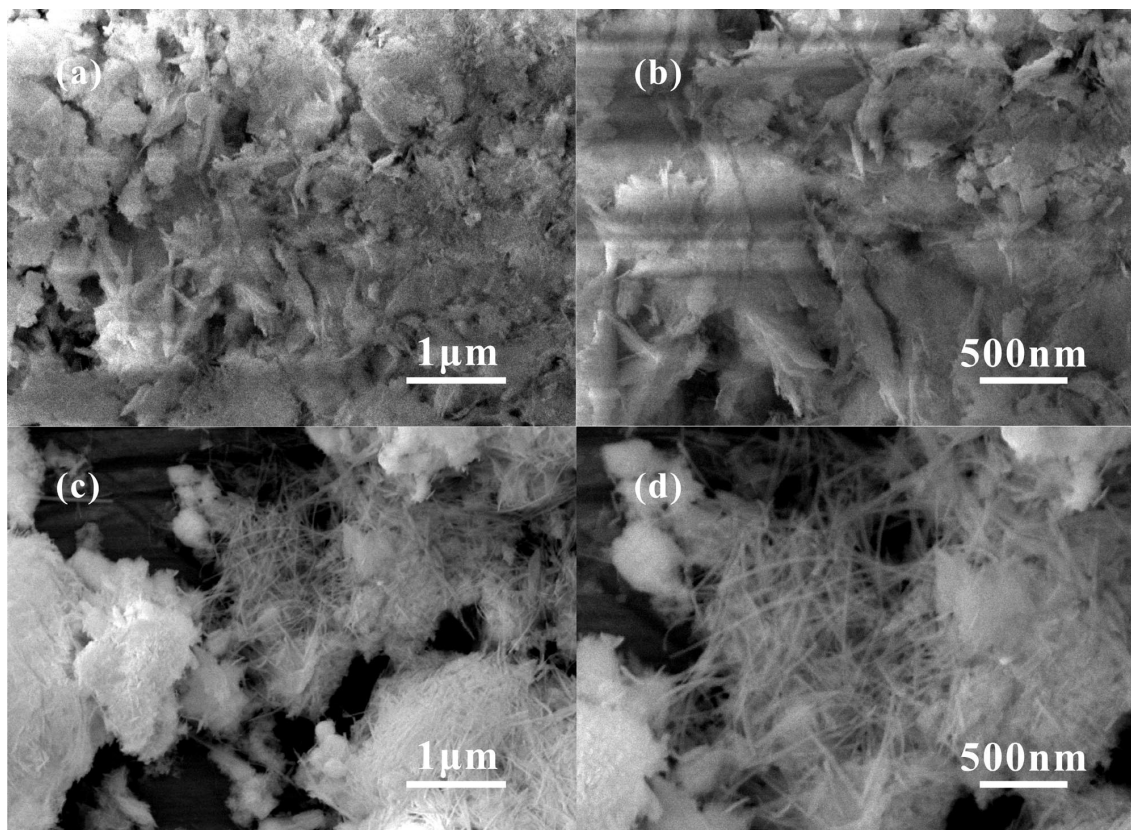

**Fig. S5** SEM images of the BiDy composite nanoscale materials with different magnifications obtained from 180 °C for different time using 5wt.% SDS. (a) and (b) 0.5 h, (c) and (d) 12 h.

Fig. S6 shows the XRD patterns of the BiDy composite nanoscale materials obtained from 180 °C for different time using 5wt.% SDS.

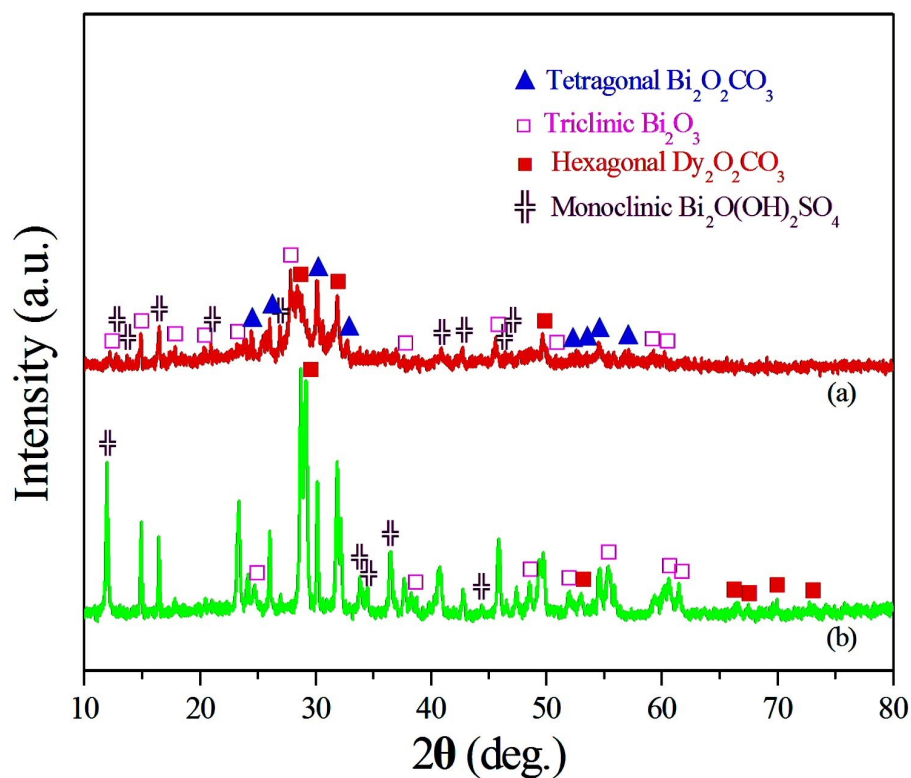

**Fig. S6** XRD patterns of the BiDy composite nanoscale materials obtained from 180 °C for different time using 5wt.% SDS. (a) 0.5 h, (b) 12 h.

Fig. S7 shows the growth schematic of the BiDy composite nanowires by the SDS induced hydrothermal process.

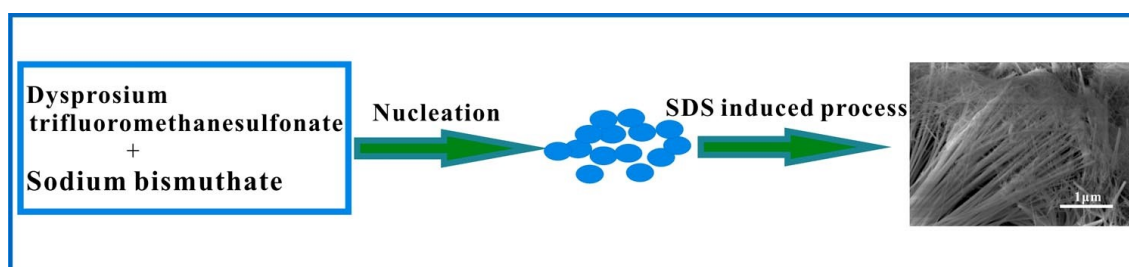

**Fig. S7** Growth schematic of the BiDy composite nanowires by the SDS induced hydrothermal process.

Fig. S8 shows the CVs of 2 mM L-cysteine in the presence of the interfering species including phenol, tartaric acid, ascorbic acid and citric acid with the concentration of 2 mM, respectively in 0.1 M KCl solution at the BiDy composite nanowires modified GCE.

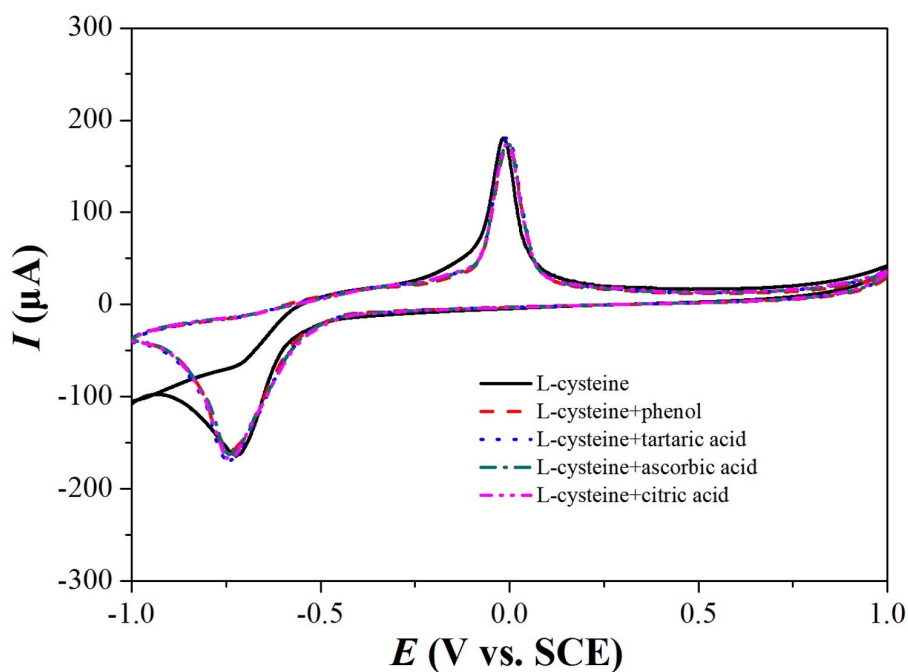

**Fig. S8** CVs of 2 mM L-cysteine in the presence of the interfering species including phenol, tartaric acid, ascorbic acid and citric acid with the concentration of 2 mM, respectively in 0.1 M KCl solution at the BiDy composite nanowires modified GCE. Scan rate,  $50 \text{ mV} \cdot \text{s}^{-1}$
